# Supplementary material
Source: HighWire-hosted journal article supplement (https://www.cmajopen.ca/highwire/filestream/88759/field_highwire_adjunct_files/2/open-2021-0257-3-at.pdf)
Supplement: open-2021-0257-3-at.pdf [file open-2021-0257-3-at.pdf]

**Appendix 3. Antibiotics that were used in more than 1% of prescriptions against a given infection, despite not being mentioned in the 2009 guidelines.**

| Age group                 | Infection   | Antibiotic              | Proportion of prescriptions delivered for the infection over the study period (%) |
|---------------------------|-------------|-------------------------|-----------------------------------------------------------------------------------|
| Children (0-17 years old) | Otitis      | None                    | -                                                                                 |
|                           | Pharyngitis | Cefprozil               | 6,3                                                                               |
|                           |             | Amoxicillin-clavulanate | 1,9                                                                               |
|                           | Pneumonia   | Cefprozil               | 7,3                                                                               |
|                           | Sinusitis   | Azithromycin            | 4,2                                                                               |
| Adults                    | COPD        | Cefprozil               | 5,6                                                                               |
|                           |             | Amoxicillin             | 23,5                                                                              |
|                           | Pharyngitis | Amoxicillin-clavulanate | 4,3                                                                               |
|                           |             | Clindamycin             | 3,8                                                                               |
|                           |             | Cefprozil               | 3,5                                                                               |
|                           | Pneumonia   | Amoxicillin             | 2,7                                                                               |
|                           |             | Amoxicillin-clavulanate | 9,4                                                                               |
|                           |             | Cefprozil               | 2,5                                                                               |
|                           |             | Ciprofloxacin           | 1,5                                                                               |
|                           | Sinusitis   | Cefprozil               | 7,5                                                                               |
| Azithromycin              |             | 4,6                     |                                                                                   |

Note: Antibiotic used in less than 1% of prescriptions are not presented.
